# Supplementary material
Source: PubMed Central journal article supplement (PMC5915187)
Supplement: EHP1677.s001.acco.pdf [file EHP1677.s001.acco.pdf]

**Note to readers with disabilities:** *EHP* strives to ensure that all journal content is accessible to all readers. However, some figures and Supplemental Material published in *EHP* articles may not conform to [508 standards](#) due to the complexity of the information being presented. If you need assistance accessing journal content, please contact [ehp508@niehs.nih.gov](mailto:ehp508@niehs.nih.gov). Our staff will work with you to assess and meet your accessibility needs within 3 working days.

### **Supplemental Material**

#### **Respiratory, Dermal, and Eye Irritation Symptoms Associated with Corexit™ EC9527A/EC9500A following the *Deepwater Horizon* Oil Spill: Findings from the GuLF STUDY**

Craig J. McGowan, Richard K. Kwok, Lawrence S. Engel, Mark R. Stenzel, Patricia A. Stewart, and Dale P. Sandler

#### **Table of Contents**

**Table S1:** Enrollment Survey questions with positive responses used to classify exposure status of participants

**Table S2:** Symptoms at spill response associated with dispersant exposure, differentiating potential exposure to specific dispersants (GuLF STUDY 2011-2013)

**Table S3:** Respiratory and eye irritation symptoms at the time of spill response associated with dispersant exposure, stratified by work location during spill response (GuLF STUDY 2011-2013)

**Table S4:** Symptoms at spill response associated with dispersant exposure, stratified by the estimated airborne level of THC exposure (GuLF STUDY 2011-2013)

**Table S5:** Symptoms within 30 days of enrollment associated with dispersant exposure, stratified by presence/absence of symptom at time of spill response (GuLF STUDY, 2011-2013)

Table S1 - Enrollment Survey questions with positive responses used to classify exposure status of participants

| Question # | Question                                                                                                                                                                                                                                                    | Overall exposure | Personal exposure |
|------------|-------------------------------------------------------------------------------------------------------------------------------------------------------------------------------------------------------------------------------------------------------------|------------------|-------------------|
| E9g1       | Dispersant is the chemical used to break up the oil in the water. Did you work on a vessel that handled dispersant?                                                                                                                                         | X                |                   |
| E9h1       | Did you work on a vessel that sprayed dispersant on the surface of the water?                                                                                                                                                                               | X                |                   |
| E10d2      | You said you worked on a vessel that applied dispersant to the water. Did you personally prepare the dispersant by mixing it with water or other chemicals?                                                                                                 | X                | X                 |
| E10d14     | Did you personally spray dispersant or directly help another person spray dispersant onto the water from a vessel?                                                                                                                                          | X                | X                 |
| E10e1      | Did you work outside, for example on a deck, while dispersant was being sprayed by someone on the vessel?                                                                                                                                                   | X                | X                 |
| E31a       | Dispersants are chemicals used to break up the oil on the water. Did you ever handle dispersants on land or apply them by plane?                                                                                                                            | X                |                   |
| E32b       | Did you prepare dispersant by mixing it with water or other chemicals?                                                                                                                                                                                      | X                | X                 |
| E32c       | Did you spray dispersants from a plane?                                                                                                                                                                                                                     | X                |                   |
| E36a       | Did you maintain or work on pumps or tanks that held dispersant, fuel, oil or oily water or something else?<br>*Required response of at least half of the time to "How much of the time did the pumps or tanks hold dispersant?"                            | X                | X                 |
| E36b       | Did you handle or pump dispersant, fuel, oil or oily water, or something else?<br>*Required response of at least half of the time to "How much of the time that you handled or pumped these materials was it dispersant?"                                   | X                | X                 |
| E36c       | Did you connect or disconnect hoses or lines used to transfer dispersant, gasoline, diesel fuel, oil or oily water, or something else?<br>*Required response of at least half of the time to "How much of the time did the transfer lines hold dispersant?" | X                | X                 |

Table S2: Symptoms at spill response associated with dispersant exposure, differentiating potential exposure to specific dispersants (GuLF STUDY 2011-2013)

| <i>Symptom</i>               | <i>Only 9500 Exposure</i> |               | <i>Possible 9527 Exposure</i> |               |
|------------------------------|---------------------------|---------------|-------------------------------|---------------|
|                              | <i>aPR<sup>a</sup></i>    | <i>95% CI</i> | <i>aPR<sup>a</sup></i>        | <i>95% CI</i> |
| Cough                        | 1.32                      | (1.16, 1.50)  | 1.40                          | (1.19, 1.64)  |
| Wheeze                       | 1.19                      | (1.02, 1.38)  | 1.34                          | (1.12, 1.60)  |
| Tightness in chest           | 1.33                      | (1.10, 1.63)  | 1.79                          | (1.45, 2.21)  |
| Shortness of breath          | 1.23                      | (1.05, 1.45)  | 1.41                          | (1.16, 1.70)  |
| Burning in nose/throat/lungs | 1.22                      | (1.01, 1.47)  | 1.82                          | (1.52, 2.19)  |
| Burning eyes                 | 1.25                      | (1.08, 1.44)  | 1.50                          | (1.28, 1.75)  |
| Itchy eyes                   | 1.12                      | (1.00, 1.26)  | 1.31                          | (1.17, 1.47)  |
| Skin irritation              | 1.28                      | (1.15, 1.43)  | 1.21                          | (1.05, 1.39)  |

<sup>a</sup>All models adjusted for gender, age, race, education. Skin irritation models further adjusted for contact with oil/tar and contact with cleaning chemicals. Respiratory and eye irritation models further adjusted for smoking, residential proximity to oil spill, level of oil exposure (THC), use of decontamination chemicals, and pre-existing lung disease (respiratory models).

Table S3 - Respiratory and eye irritation symptoms at the time of spill response associated with dispersant exposure, stratified by work location during spill response (GuLF STUDY 2011-2013)

| <i>Outcome</i>               | <i>Worked only on land</i> |               | <i>On the water, away from wellhead</i> |               | <i>On the water, near wellhead</i> |               |
|------------------------------|----------------------------|---------------|-----------------------------------------|---------------|------------------------------------|---------------|
|                              | <i>aPR<sup>a</sup></i>     | <i>95% CI</i> | <i>aPR<sup>a</sup></i>                  | <i>95% CI</i> | <i>aPR<sup>a</sup></i>             | <i>95% CI</i> |
| Cough                        | 1.34                       | (1.16, 1.54)  | 1.52                                    | (1.26, 1.83)  | 1.43                               | (1.18, 1.74)  |
| Wheeze                       | 1.29                       | (1.10, 1.51)  | 1.77                                    | (1.43, 2.18)  | 1.25                               | (1.00, 1.56)  |
| Tightness in chest           | 1.52                       | (1.25, 1.85)  | 1.74                                    | (1.31, 2.30)  | 1.48                               | (1.11, 1.98)  |
| Shortness of breath          | 1.35                       | (1.14, 1.59)  | 1.55                                    | (1.23, 1.96)  | 1.60                               | (1.25, 2.05)  |
| Burning in nose/throat/lungs | 1.65                       | (1.38, 1.97)  | 1.75                                    | (1.35, 2.28)  | 1.53                               | (1.18, 1.99)  |
| Burning eyes                 | 1.39                       | (1.21, 1.60)  | 1.85                                    | (1.51, 2.28)  | 1.48                               | (1.20, 1.81)  |
| Itchy eyes                   | 1.30                       | (1.16, 1.46)  | 1.55                                    | (1.31, 1.84)  | 1.32                               | (1.12, 1.55)  |

<sup>a</sup>All models adjusted for gender, age, race, education, smoking, residential proximity to oil spill, level of oil exposure (THC), use of decontamination chemicals, and pre-existing lung disease (respiratory models).

Table S4 - Symptoms at spill response associated with dispersant exposure, stratified by the estimated airborne level of THC exposure (Gulf STUDY 2011-2013)

| Symptom                        | THC < 0.3ppm (N=11,714 <sup>b</sup> , 12,059 <sup>c</sup> ) |                      |                           | THC 0.3-0.99ppm (N=7,226 <sup>b</sup> , 7,423 <sup>c</sup> ) |                      |                           |
|--------------------------------|-------------------------------------------------------------|----------------------|---------------------------|--------------------------------------------------------------|----------------------|---------------------------|
|                                | Exposed<br>[n (%)]                                          | Unexposed<br>[n (%)] | aPR (95% CI) <sup>a</sup> | Exposed<br>[n (%)]                                           | Unexposed<br>[n (%)] | aPR (95% CI) <sup>a</sup> |
| Cough                          | 6 (21%)                                                     | 922 (8%)             | 2.14 (1.10, 4.14)         | 82 (22%)                                                     | 798 (12%)            | 1.38 (1.13, 1.69)         |
| Wheeze                         | 5 (18%)                                                     | 736 (6%)             | 2.76 (1.29, 5.90)         | 63 (17%)                                                     | 600 (9%)             | 1.25 (0.99, 1.58)         |
| Tightness in chest             | 5 (18%)                                                     | 423 (4%)             | 3.76 (1.73, 8.17)         | 50 (14%)                                                     | 390 (6%)             | 1.50 (1.14, 1.97)         |
| Shortness of breath            | 5 (18%)                                                     | 640 (5%)             | 2.51 (1.19, 5.27)         | 63 (17%)                                                     | 565 (8%)             | 1.35 (1.07, 1.70)         |
| Burning in nose, throat, lungs | 3 (11%)                                                     | 375 (3%)             | 2.33 (0.84, 6.46)         | 54 (15%)                                                     | 439 (6%)             | 1.54 (1.18, 2.00)         |
| Burning eyes                   | 4 (14%)                                                     | 686 (6%)             | 1.70 (0.71, 4.06)         | 79 (21%)                                                     | 722 (10%)            | 1.38 (1.13, 1.69)         |
| Itching eyes                   | 4 (14%)                                                     | 1,151 (10%)          | 1.10 (0.46, 2.61)         | 104 (28%)                                                    | 1,034 (15%)          | 1.35 (1.14, 1.59)         |

| Symptom                        | THC 1.0-2.99ppm (N=6,601 <sup>b</sup> , 6,805 <sup>c</sup> ) |                      |                           | THC ≥3.0ppm (N=3,095 <sup>b</sup> , 3,181 <sup>c</sup> ) |                      |                           |
|--------------------------------|--------------------------------------------------------------|----------------------|---------------------------|----------------------------------------------------------|----------------------|---------------------------|
|                                | Exposed<br>[n (%)]                                           | Unexposed<br>[n (%)] | aPR (95% CI) <sup>a</sup> | Exposed<br>[n (%)]                                       | Unexposed<br>[n (%)] | aPR (95% CI) <sup>a</sup> |
| Cough                          | 156 (25%)                                                    | 660 (11%)            | 1.49 (1.26, 1.75)         | 290 (25%)                                                | 262 (13%)            | 1.43 (1.23, 1.66)         |
| Wheeze                         | 137(22%)                                                     | 504 (8%)             | 1.60 (1.34, 1.92)         | 221 (19%)                                                | 210 (11%)            | 1.31 (1.10, 1.56)         |
| Tightness in chest             | 92 (14%)                                                     | 309 (5%)             | 1.70 (1.34, 2.14)         | 158 (14%)                                                | 126 (6%)             | 1.51 (1.20, 1.89)         |
| Shortness of breath            | 119 (19%)                                                    | 451 (8%)             | 1.53 (1.26, 1.86)         | 200 (17%)                                                | 171 (9%)             | 1.42 (1.17, 1.72)         |
| Burning in nose, throat, lungs | 120 (19%)                                                    | 350 (6%)             | 1.93 (1.57, 2.36)         | 190 (17%)                                                | 161 (8%)             | 1.45 (1.19, 1.78)         |
| Burning eyes                   | 171 (26%)                                                    | 621 (10%)            | 1.71 (1.46, 2.00)         | 258 (22%)                                                | 232 (12%)            | 1.47 (1.24, 1.74)         |
| Itching eyes                   | 219 (33%)                                                    | 828 (13%)            | 1.59 (1.40, 1.82)         | 332 (28%)                                                | 349 (17%)            | 1.26 (1.10, 1.44)         |

<sup>a</sup>All models adjusted for gender, age, race, education, smoking, residential proximity to oil spill, use of decontamination chemicals, and pre-existing lung disease (respiratory models).

<sup>b</sup>N for respiratory symptoms

<sup>c</sup>N for eye irritation symptoms

Table S5 - Symptoms within 30 days of enrollment associated with dispersant exposure, stratified by presence/absence of symptom at time of spill response (Gulf STUDY, 2011-2013)

| Symptom                        | Symptoms at spill     |                    |                      |                                  | No symptoms at spill  |                    |                      |                                  |
|--------------------------------|-----------------------|--------------------|----------------------|----------------------------------|-----------------------|--------------------|----------------------|----------------------------------|
|                                | <i>N</i> <sup>a</sup> | Exposed<br>[n (%)] | Unexposed<br>[n (%)] | <i>aPR</i> <sup>b</sup> (95% CI) | <i>N</i> <sup>a</sup> | Exposed<br>[n (%)] | Unexposed<br>[n (%)] | <i>aPR</i> <sup>b</sup> (95% CI) |
| Cough                          | 3,136                 | 306 (58%)          | 1,453 (56%)          | 0.93 (0.86, 1.02)                | 24,670                | 279 (17%)          | 2,390 (10%)          | 1.04 (0.93, 1.18)                |
| Wheeze                         | 2,430                 | 241 (58%)          | 1,079 (54%)          | 1.05 (0.95, 1.15)                | 25,418                | 235 (14%)          | 1,285 (5%)           | 1.27 (1.10, 1.45)                |
| Tightness in chest             | 1,530                 | 162 (54%)          | 612 (50%)            | 1.03 (0.91, 1.18)                | 26,391                | 171 (9%)           | 828 (3%)             | 1.31 (1.10, 1.56)                |
| Shortness of breath            | 2,184                 | 222 (58%)          | 993 (55%)            | 1.02 (0.92, 1.13)                | 25,789                | 210 (12%)          | 1,121 (5%)           | 1.19 (1.04, 1.36)                |
| Burning in nose, throat, lungs | 1,685                 | 139 (38%)          | 440 (33%)            | 1.18 (0.99, 1.40)                | 26,285                | 104 (6%)           | 552 (2%)             | 1.55 (1.23, 1.96)                |
| Burning Eyes                   | 2,612                 | 239 (49%)          | 895 (42%)            | 1.18 (1.04, 1.33)                | 25,537                | 121 (7%)           | 788 (3%)             | 1.33 (1.07, 1.64)                |
| Itching Eyes                   | 3,816                 | 321 (51%)          | 1,493 (47%)          | 1.08 (0.98, 1.19)                | 24,323                | 157 (10%)          | 1,240 (5%)           | 1.17 (0.98, 1.40)                |
| Skin irritation                | 4,651                 | 150 (28%)          | 1,679 (41%)          | 0.86 (0.74, 1.00)                | 21,598                | 57 (12%)           | 7,212 (34%)          | 0.60 (0.47, 0.77)                |

<sup>a</sup> N with symptoms at spill and N without symptoms at spill do not sum to total enrollment model counts because of missing values for symptoms at spill.

<sup>b</sup> All models adjusted for gender, age, race, education, unemployment, disability, financial and perceived stress. Skin irritation models further adjusted for contact with oil/tar and contact with cleaning chemicals. Respiratory and eye irritation models further adjusted for smoking, residential proximity to oil spill, level of oil exposure (THC), use of decontamination chemicals, and pre-existing lung disease (respiratory models only).
